# Supplementary material for: Frequency and Type of Disputed rpoB Mutations in Mycobacterium tuberculosis Isolates from South Korea
Source: PubMed Central journal article supplement — Tuberc Respir Dis (Seoul). 2017 Jul 3;80(3):270–6. doi: 10.4046/trd.2017.80.3.270 (PMC5526954; doi:10.4046/trd.2017.80.3.270), 2017-07-03
Supplement: trd-80-270-s001.pdf [file trd-80-270-s001.pdf]

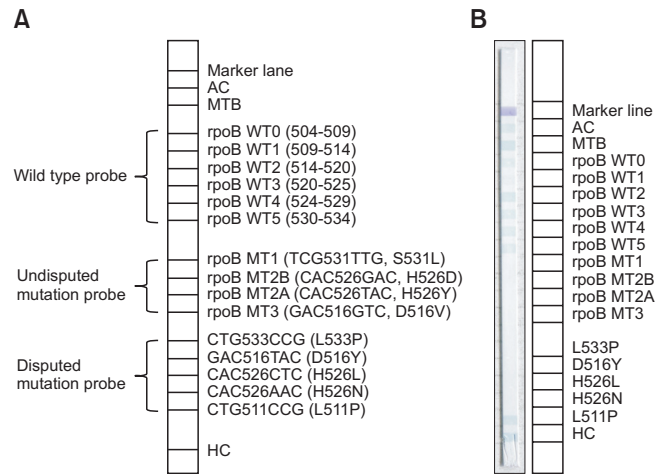

**Supplementary Fig. S1.** (A) A schematic illustration of each probe from the upgraded version of the MolecuTech REBA MTB-MDR Kit. (B) Detection of the CTG511CCG (L511P) disputed *rpoB* mutation using the upgraded version of the MolecuTech REBA MTB-MDR Kit.
